# Supplementary material for: Leveraging the Role of the Metastatic Associated Protein Anterior Gradient Homologue 2 in Unfolded Protein Degradation: A Novel Therapeutic Biomarker for Cancer
Source: Cancers (Basel). 2019 Jun 26;11(7):890. doi: 10.3390/cancers11070890 (PMC6678570; doi:10.3390/cancers11070890)
Supplement: Supplementary file 1 [file cancers-11-00890-s001.xlsx]

## Sheet: Sheet1
Table S1. All 245 differentially expressed genes detected in meningiomas with high AGR2 expression.
Gene Symbol	Gene Name	Fold Change	p-Value	Function
AGR2	anterior gradient 2	90.21	1.99E−15	Disulphide isomerase
CALB1	calbindin 1	49.78	0.0232	Calcium-binding
KCNT2	potassium sodium-activated channel subfamily T member 2	34.47	1.69E−05	Membrane potential
DSC3	desmocollin 3	33.8	1.36E−05	Cellular process
HOPX	HOP homeobox	27.67	0.0024	Transcription
GPR83	G protein-coupled receptor 83	22.02	0.0013	Signal transduction
CA3	carbonic anhydrase 3	21.83	0.011	Co2 metabolism
ATP1A2	ATPase Na+/K+ transporting subunit alpha 2	21.78	0.0293	Transporter
KCNJ8	potassium voltage-gated channel subfamily J member 8	19.69	0.0011	Ion channel
GRB14	growth factor receptor bound protein 14	17.69	0.019	Receptor signaling
NEFL	neurofilament light	17.55	0.0044	Neurofilament
GJA3	gap junction protein alpha 3	17.43	0.0008	Cellular process
FMO2	flavin containing monooxygenase 2	17.07	6.00E−05	Monooxygenase activity
CPA4	carboxypeptidase A4	16.22	0.0007	Peptidase
ANGPT2	angiopoietin 2	15.26	0.0007	Cell adhesion
GAP43	growth associated protein 43	14.91	0.0069	Neuronal growth
DCLK1	doublecortin like kinase 1	13.38	0.0004	Protein kinase activity
ADAMTS15	ADAM metallopeptidase with thrombospondin type 1 motif 15	12.78	0.0004	Peptidase
CFH	complement factor H	11.86	0.0018	Immune defence
MAPK4	mitogen-activated protein kinase 4	11.59	8.34E−05	Phosphorylation
LAMA1	laminin subunit alpha 1	11.01	0.0011	Exo-glycoprotein
CHMP4C	charged multivesicular body protein 4C	10.35	2.09E−05	Transporter
ADAMTS17	ADAM metallopeptidase with thrombospondin type 1 motif 17	10.1	6.29E−06	Peptidase
DSG2	desmoglein 2	9.14	0.0064	Cell adhesion
LUM	lumican	8.51	0.0278	Fibril organization
RELN	reelin	8.51	0.0013	Peptidase
ARHGAP28	Rho GTPase activating protein 28	8.2	0.0002	Actin assembly
EPHA7	EPH receptor A7	7.86	3.37E−06	Axion guidance
ADAMTS5	ADAM metallopeptidase with thrombospondin type 1 motif 5	7.57	0.0025	Peptidase
FREM1	FRAS1 related extracellular matrix 1	7.53	1.49E−05	Signal transduction
LOC100507461	uncharacterized LOC100507461	7.28	9.25E−10	Unknown
RNASE1	ribonuclease A family member 1, pancreatic	7.07	0.0121	Enzyme
GCNT2	glucosaminyl (N-acetyl) transferase 2 (I blood group)	6.96	0.0023	Glycosylation
IQCJ-SCHIP1	IQCJ-SCHIP1 readthrough; schwannomin interacting protein 1	6.92	0.043	Cell junction
; SCHIP1
PSAT1	phosphoserine aminotransferase 1	6.55	0.04	Enzyme
C4orf19	chromosome 4 open reading frame 19	6.51	0.0007	Cell junction
SLC7A11	solute carrier family 7 member 11	6.51	0.0067	Transporter
SPP1	secreted phosphoprotein 1	6.21	0.0469	Phosphatase
HIST1H1C	histone cluster 1 H1 family member c	6.12	5.43E−05	DNA recombination
NID1	nidogen 1	6.1	0.0045	Glycoprotein
IGDCC4	immunoglobulin superfamily DCC subclass member 4	6.03	0.002	Transmembrane
SLC6A13	solute carrier family 6 member 13	6.01	0.0012	Transporter
NAV1	neuron navigator 1	5.99	0.0194	Neuro-development
HIST2H2BE	histone cluster 2 H2B family member e	5.68	3.06E−06	Nucleosome assembly
TMEM108	transmembrane protein 108	5.64	0.0025	Transmembrane
PANK1	pantothenate kinase 1	5.61	0.0028	Kinase
PAQR5	progestin and adipoQ receptor family member 5	5.52	0.0005	Receptor
LOC440982; ZIC1	uncharacterized LOC440982; Zic family member 1	5.52	0.0151	Transcription
COL18A1	collagen type XVIII alpha 1 chain	5.51	7.53e-05	Extracellular matrix
ABCC9	ATP binding cassette subfamily C member 9	5.44	0.0325	Ion channel
OLAH	oleoyl-ACP hydrolase	5.4	0.0006	Lipid biosynthesis
ERO1A	endoplasmic reticulum oxidoreductase 1 alpha	5.3	0.0008	Enzyme
C1QTNF1	C1q and tumor necrosis factor related protein 1	5.3	0.0004	Collagen binding
GDF15	growth differentiation factor 15	5.26	0.0076	Growth factor
ATP8B1	ATPase phospholipid transporting 8B1	5.26	0.0442	Golgi organization
PPFIBP1	PPFIA binding protein 1	5.19	0.0016	Cadherin binding
CFH; CFHR1	complement factor H; complement factor H-related 1	5.11	0.0076	Immune defence
AGTR1	angiotensin II receptor type 1	5.09	0.0056	Immune defence
DSC2	desmocollin 2	5.08	0.0002	Cell adhesion
ZIC1	Zic family member 1	5	0.0411	Transcription
CTSV	cathepsin V	4.84	1.54e-06	Peptidase
BEAN1	brain expressed, associated with NEDD4, 1	4.84	2.16E−08	Transmembrane
PCDHB2	protocadherin beta 2	4.75	0.0343	Cell adhesion
H2BFS;	H2B histone family, member S (pseudogene); histone cluster 1, H2bk; histone H2B type F-S-like	4.75	0.0003	Chromatin organization
HIST1H2BK;
LOC102724334
SSTR2	somatostatin receptor 2	4.74	0.0098	Neuropeptide signaling
FREM2	FRAS1 related extracellular matrix protein 2	4.69	0.0374	Signal transduction
BTNL9	butyrophilin like 9	4.68	0.0092	Immune defence
HIST2H2AA3;	histone cluster 2 H2A family member a3; histone cluster 2 H2A family member a4	4.6	0.0032	Chromatin organization
HIST2H2AA4
DMD	Dystrophin	4.59	0.0241	Cytoskeleton
SYTL5	synaptotagmin like 5	4.59	0.0194	Exocytosis
KLRC4-KLRK1;	KLRC4-KLRK1 readthrough; killer cell lectin-like receptor subfamily K, member 1	4.59	0.0283	Mediated cytotoxicity
KLRK1
ARHGAP20	Rho GTPase activating protein 20	4.56	0.0038	GTPase Activator
RAPGEF5	Rap guanine nucleotide exchange factor 5	4.49	5.52e-05	GTP binding
APOLD1	apolipoprotein L domain containing 1	4.48	0.026	Angiogenesis
NDUFA4L2	NDUFA4, mitochondrial complex associated like 2	4.44	0.0024	Oxidoreductase
ARNT2	aryl hydrocarbon receptor nuclear translocator 2	4.43	0.0088	Transcription
ELOVL2	ELOVL fatty acid elongase 2	4.35	0.0051	Fatty acid biosynthesis
WNT6	Wnt family member 6	4.27	0.0058	Frizzled binding
ID4	inhibitor of DNA binding 4, HLH protein	4.26	0.0121	Transcription
KLRC3	killer cell lectin like receptor C3	4.26	0.003	Transmembrane
ROBO1	roundabout guidance receptor 1	4.22	0.0122	Angiogenesis
CLEC2B	C-type lectin domain family 2 member B	4.19	0.0014	Lymphoid cell
PLEKHG4B	pleckstrin homology and RhoGEF domain containing G4B	4.19	0.0004	Neuro-development
HACD1	3-hydroxyacyl-CoA dehydratase 1	4.18	5.14e-05	Enzyme
HIST1H2BD	histone cluster 1 H2B family member d	4.12	0.0007	Nucleosome assembly
PPARGC1A	PPARG coactivator 1 alpha	4.11	0.0003	Transcription
LOC102724156	uncharacterized LOC102724156	4.05	3.04E−08	Unknown
C21orf62	chromosome 21 open reading frame 62	4	0.0122	Unknown
NALCN	sodium leak channel, non-selective	3.98	6.71E−07	Localization
HEY1	hes related family bHLH transcription factor with YRPW motif 1	3.96	0.0143	Notch signaling pathway
TMTC4	transmembrane and tetratricopeptide repeat containing 4	3.94	0.0162	Transcription
TCERG1L	transcription elongation regulator 1 like	3.93	0.0447	Transcription
HIST1H4H	histone cluster 1 H4 family member h	3.91	8.51E−06	Nucleosome assembly
CDKN2A	cyclin dependent kinase inhibitor 2A	3.83	0.0036	Transcription
CCND1	cyclin D1	3.8	0.0057	Cell proliferation
PAG1	phosphoprotein membrane anchor with glycosphingolipid microdomains 1	3.79	0.0023	TCR signaling
KIAA0101	KIAA0101	3.72	0.0394	Translesion synthesis
HIST1H2BH	histone cluster 1 H2B family member h	3.71	0.0001	Nucleosome assembly
ALDOA	aldolase, fructose-bisphosphate A	3.7	0.0088	Enzyme
CKS2	CDC28 protein kinase regulatory subunit 2	3.63	0.0001	Mitotic division
OLFM4	olfactomedin 4	3.56	0.0001	Cell adhesion
MRO	maestro	3.55	0.0483	Nucleolus
SCD	stearoyl-CoA desaturase	3.51	0.001	Biosynthesis
SLC22A23	solute carrier family 22 member 23	3.46	0.0036	Ion transport
PVALB	parvalbumin	3.43	0.0025	Calmodulin
KIF23	kinesin family member 23	3.37	4.93e-05	Microtubule binding
WDR86-AS1	WDR86 antisense RNA 1	3.36	0.0409	Unknown
HIST1H2BK	histone cluster 1 H2B family member k	3.32	0.0005	Nucleosome assembly
RCN1	reticulocalbin 1	3.29	8.08E−06	Calmodulin
ALG6	ALG6, alpha-1,3-glucosyltransferase	3.23	0.0217	Lipid metabolism
GATA3	GATA binding protein 3	3.13	0.0075	Transcription
PDK1	pyruvate dehydrogenase kinase 1	3.1	0.0003	Signal transduction
KRT18	keratin 18	3.08	0.0156	Embryogenesis
GFPT2	glutamine-fructose-6-phosphate transaminase 2	3.06	0.0078	Metabolic
PPIF	peptidylprolyl isomerase F	2.99	0.0193	Response to drug
CYSLTR1	cysteinyl leukotriene receptor 1	2.95	0.0259	Neuropeptide signaling
RETREG1	reticulophagy regulator 1	2.91	0.0137	ER regulator
SCUBE3	signal peptide, CUB domain and EGF like domain containing 3	2.73	0.0126	Glycoprotein
MYO1B	myosin IB	2.7	0.0409	Enzyme
VTN	Vitronectin	2.67	0.0185	Cell adhesion
SCARB1	scavenger receptor class B member 1	2.65	0.0002	Cell adhesion
CNTNAP3;	contactin associated protein-like 3; contactin associated protein-like 3B; contactin associated protein-like 3 pseudogene 2; contactin associated protein-like 3-like; contactin-associated protein-like 3B	2.65	0.0062	Unknown
CNTNAP3B;
CNTNAP3P2;
LOC100289279; LOC105369234
SIPA1L2	signal induced proliferation associated 1 like 2	2.61	0.02	Cell adhesion
EPS8L2	EPS8 like 2	2.6	0.001	Transduction
SPAG4	sperm associated antigen 4	2.57	0.0136	Protein localization
MIR210HG	MIR210 host gene	2.52	0.0022	Unknown
TBC1D9	TBC1 domain family member 9	2.32	0.0149	Transport
EGLN3	egl-9 family hypoxia inducible factor 3	2.29	0.0059	Hypoxia
ESYT3	extended synaptotagmin 3	−2.36	1.74E−06	Ammonium ion binding
PLSCR4	phospholipid scramblase 4	−2.44	0.0051	Phospholipid translocation
MYO5B	myosin VB	−2.53	0.0025	Cytokinesis
ADAM22	ADAM metallopeptidase domain 22	−2.6	0.0379	Peptidase
KCNK5	potassium two pore domain channel subfamily K member 5	−2.62	0.0072	Membrane potential
BOC	BOC cell adhesion associated, oncogene regulated	−2.71	0.0042	Hedgehog
PRKAA2	protein kinase AMP-activated catalytic subunit alpha 2	−2.71	0.0003	Signal transduction
SMAD9	SMAD family member 9	−2.73	3.63E−05	Signal transduction
AHCYL2	adenosylhomocysteinase like 2	−2.77	0.0319	Drug metabolism
SH3BP4	SH3 domain binding protein 4	−2.82	0.0213	Endocytosis
BCAR3	BCAR3, NSP family adaptor protein	−2.83	0.0412	Signal transduction
DISP2	dispatched RND transporter family member 2	−2.85	0.0418	Receptor signaling
SH3BGRL2	SH3 domain binding glutamate rich protein like 2	−2.87	0.0323	SH3 domain binding
PM20D2	peptidase M20 domain containing 2	−2.94	0.0224	Catabolic processes
GDAP1	ganglioside induced differentiation associated protein 1	−2.96	0.0127	Cellular response
SCARA5	scavenger receptor class A member 5	−3.01	0.0495	Oxidase
SORL1	sortilin related receptor 1	−3.02	0.0015	Transporter
CDON	cell adhesion associated, oncogene regulated	−3.05	0.012	Hedgehog
CDH5	cadherin 5	−3.11	0.0007	Cell adhesion
NTN1	netrin 1	−3.11	0.0023	Migration
DOCK9	dedicator of cytokinesis 9	−3.11	0.0027	Transporter
GALNT12	polypeptide N-acetylgalactosaminyltransferase 12	−3.13	0.0192	Enzyme
NEXN	nexilin F-actin binding protein	−3.13	0.0166	Axion guidance
TNIK	TRAF2 and NCK interacting kinase	−3.13	0.0283	MAPK cascade
CCL28	C-C motif chemokine ligand 28	−3.19	0.0179	GPCR signalling
SLC44A1	solute carrier family 44 member 1	−3.32	6.86e-05	Transporter
DLL1	delta like canonical Notch ligand 1	−3.33	6.66E−07	Angiogenesis
PDE3A	phosphodiesterase 3A	−3.33	3.74E−06	Camp signaling
MFAP4	microfibrillar associated protein 4	−3.37	0.0382	Signal transduction
KALRN	kalirin RhoGEF kinase	−3.39	0.001	Kinase
AUTS2	autism susceptibility candidate 2	−3.41	0.0004	Transcription
SEC14L2	SEC14 like lipid binding 2	−3.47	0.0003	Transport
MYLK4	myosin light chain kinase family member 4	−3.48	0.0012	Kinase activity
NRP2	neuropilin 2	−3.49	0.0413	Axion guidance
TEK	TEK receptor tyrosine kinase	−3.51	0.0018	Angiogenesis
PRKG1	protein kinase, cGMP-dependent, type I	−3.57	0.0035	Signal transduction
B4GALT1	beta-1,4-galactosyltransferase 1	−3.62	0.0053	Enzyme
ROR1	receptor tyrosine kinase like orphan receptor 1	−3.62	0.0008	Signal transduction
TRIM2	tripartite motif containing 2	−3.66	0.0088	Enzyme
SERTM1	serine rich and transmembrane domain containing 1	−3.67	0.0416	Transmembrane
MAP3K5	mitogen-activated protein kinase kinase kinase 5	−3.69	0.0009	MAPKK activity
SLC1A4	solute carrier family 1 member 4	−3.84	7.40E−07	Transporter
FRY	FRY microtubule binding protein	−3.85	0.0267	Enzyme inhibitor
ITPR1	inositol 1,4,5-trisphosphate receptor type 1	−3.88	0.0031	Calcium sequestering
PLPP3	phospholipid phosphatase 3	−4.01	0.0001	Phospholipid metabolism
PODN	podocan	−4.02	0.0001	Collagen binding
MATN2	matrilin 2	−4.1	0.0002	Bone morphogenesis
DDAH1	dimethylarginine dimethylaminohydrolase 1	−4.12	0.0025	Amino acid metabolism
PXDN	peroxidasin	−4.17	0.0017	Response to toxic substance
SAMD12	sterile alpha motif domain containing 12	−4.2	0.0012	Expressed in brain
MN1	MN1 proto-oncogene, transcriptional regulator	−4.23	0.0002	Transcription
FGL2	fibrinogen like 2	−4.24	0.0309	Cell adhesion
CACNA1D	calcium voltage-gated channel subunit alpha1 D	−4.25	0.0002	Ion channel
NLGN1	neuroligin 1	−4.31	0.0453	Cell adhesion
SYTL2	synaptotagmin like 2	−4.44	0.0136	Phosphatidylserine binding
PAPPA	pappalysin 1	−4.45	0.002	IGF transporter
RUNX1T1	RUNX1 translocation partner 1	−4.51	1.28e-06	Transcription
SLC39A14	solute carrier family 39 member 14	−4.55	0.0058	Transporter
IGFBP5	insulin like growth factor binding protein 5	−4.63	0.0016	Growth factor
FBXO32	F-box protein 32	−4.79	0.012	Enzyme
PLXNA2	plexin A2	−4.92	0.0019	Axion guidance
PLCB4	phospholipase C beta 4	−4.96	0.0014	Signal transduction
MEG3	maternally expressed 3	−5.04	0.0168	Regulates p53
DOK5	docking protein 5	−5.08	0.0204	Axion guidance
PDGFD	platelet derived growth factor D	−5.13	8.64E−05	Cell migration
PIP5K1B	phosphatidylinositol-4-phosphate 5-kinase type 1 beta	−5.15	0.0121	Signal transduction
TGFB3	transforming growth factor beta 3	−5.2	2.14E−05	BMP signaling
MEDAG	mesenteric estrogen dependent adipogenesis	−5.26	0.0009	Differentiation
CNTN4	contactin 4	−5.43	0.0341	Cell adhesion
EBF1	early B cell factor 1	−5.63	0.0101	Transcription
LOC100288798	uncharacterized LOC100288798	−5.63	9.20E−06	Unknown
C14orf39	chromosome 14 open reading frame 39	−5.67	0.0261	DNA repair
SLC16A9	solute carrier family 16 member 9	−5.77	0.0195	Transporter
PLXNA4	plexin A4	−5.82	0.0008	Cell adhesion
LRRN1	leucine rich repeat neuronal 1	−5.86	0.0001	Extracellular matrix
FZD7	frizzled class receptor 7	−5.92	7.26E−05	Wnt signaling
TIMP3	TIMP metallopeptidase inhibitor 3	−6.07	1.90E−08	Catabolic process
RASGRF2	Ras protein specific guanine nucleotide releasing factor 2	−6.22	1.15e-05	Calmodulin binding
RBP4	retinol binding protein 4	−6.35	0.0006	Transporter
LTBP1	latent transforming growth factor beta binding protein 1	−6.36	0.0036	Cellular process
FRRS1L	ferric chelate reductase 1 like	−6.4	0.0146	Cell junction
ZNF521	zinc finger protein 521	−6.55	8.79e-06	Transcription
CD200	CD200 molecule	−6.77	0.001	Cell adhesion
CLIC5	chloride intracellular channel 5	−6.81	0.0477	Ion channel
MYLK	myosin light chain kinase	−6.88	1.31E−06	Muscle contraction
HEPH	hephaestin	−7.01	0.0423	Iron ion homeostasis
LIMCH1	LIM and calponin homology domains 1	−7.11	2.27E−05	Muscle contraction
KCNMA1	potassium calcium-activated channel subfamily M alpha 1	−7.26	0.0001	Ion channel
MGP	matrix Gla protein	−7.36	0.0014	Differentiation
ZC2HC1C	zinc finger C2HC-type containing 1C	−7.38	0.001	Metal ion binding
MRAP2	melanocortin 2 receptor accessory protein 2	−7.42	0.0019	Energy homeostasis
SLC6A6	solute carrier family 6 member 6	−7.42	0.0231	Xenobiotic transport
ADGRL2	adhesion G protein-coupled receptor L2	−7.59	8.30E−09	Adenylate cyclase
ALPL	alkaline phosphatase, liver/bone/kidney	−7.71	0.0154	Developmental process
AR	androgen receptor	−8.16	0.0004	Androgen Transcription
PLP1	proteolipid protein 1	−8.37	0.0352	Neuro-development
MT1M	metallothionein 1M	−8.52	0.0243	Response to stress
CYP4B1	cytochrome P450 family 4 subfamily B member 1	−8.65	0.0306	Fatty acid biosynthesis
GFRA1	GDNF family receptor alpha 1	−8.94	0.0033	Neuro-development
PLEKHA6	pleckstrin homology domain containing A6	−9.16	1.90E−05	Phospholipid metabolism
ADAMTSL3	ADAMTS like 3	−9.32	9.18E−05	Peptidase
PRRX1	paired related homeobox 1	−10.07	6.25e-07	Transcription
CLIC3	chloride intracellular channel 3	−10.37	0.0481	Ion channel
LEPR; LEPROT	leptin receptor; leptin receptor overlapping transcript	−10.76	1.96E−06	Protein localization
LEPR	leptin receptor	−11.52	0.0023	Cytokine receptor
SRPX	sushi repeat containing protein, X-linked	−11.97	2.02E−06	Apoptosis
GSTM5	glutathione S-transferase mu 5	−14.57	0.0017	Enzyme
UCHL1	ubiquitin C-terminal hydrolase L1	−15.03	0.005	Deubiquitination
SFRP1	secreted frizzled related protein 1	−16.21	9.44E−05	Wnt signaling
RSPO3	R-spondin 3	−17.04	0.0181	Wnt signaling
CYP1B1	cytochrome P450 family 1 subfamily B member 1	−18.42	0.0013	Enzyme
SLPI	secretory leukocyte peptidase inhibitor	−20.35	0.0015	Proteolysis
SYNPO2	synaptopodin 2	−29.75	1.54E−05	Actin assembly
NT5E	5′-nucleotidase ecto	−31.3	0.0002	Phosphatase
MFAP5	microfibrillar associated protein 5	−35.66	0.013	Elastic fibre
COL8A1	collagen type VIII alpha 1 chain	−36.36	0.035	Extracellular matrix
TCEAL2	transcription elongation factor A like 2	−48.79	0.0007	Transcription
